# Supplementary material
Source: PubMed Central journal article supplement (PMC3372273)
Supplement: supp_32.12.2254_MCB-MCB06623-11-s01.pdf [file supp_32.12.2254_MCB-MCB06623-11-s01.pdf]

| <b>SUPPLEMENTAL TABLE 1</b>       | <b>Total number of cells</b> | <b>1 focus</b> | <b>2 foci</b> | <b>Total number of foci</b> | <b>mitosis defect</b> |
|-----------------------------------|------------------------------|----------------|---------------|-----------------------------|-----------------------|
| <b>WT + Rps2-GFP</b>              | 442                          | 30 (6.8%)      | 0             | 30 (6.8%)                   | 0                     |
| <b>WT + Rpl25-GFP</b>             | 659                          | 10 (1.5%)      | 2 (0.3%)      | 14 (2.1%)                   | 0                     |
| <b><i>trm112Δ</i> + Rps2-GFP</b>  | 455                          | 65 (14.3%)     | 12 (2.6%)     | 89 (19.6%)                  | 31 (6.8%)             |
| <b><i>trm112Δ</i> + Rpl25-GFP</b> | 222                          | 13 (5.8%)      | 0             | 13 (5.8%)                   | 22 (9.9%)             |
