# Supplementary material
Source: PubMed Central journal article supplement (PMC3372273)
Supplement: supp_32.12.2254_MCB-MCB06623-11-s02.pdf [file supp_32.12.2254_MCB-MCB06623-11-s02.pdf]

SUPPLEMENTAL TABLE S2

| <b>FIG 2A</b>                | <b>20S</b> | <b>35S</b> | <b>27S</b> | <b>18S</b> | <b>25S</b> | <b>25S/18S</b> | <b>7S</b>  | <b>5.8S(S)</b> | <b>5.8S(L)</b> |
|------------------------------|------------|------------|------------|------------|------------|----------------|------------|----------------|----------------|
| <b>BY4741</b>                | <b>1</b>   | <b>1</b>   | <b>1</b>   | <b>1</b>   | <b>1</b>   | <b>1</b>       | <b>1</b>   | <b>1</b>       | <b>1</b>       |
| <b>BY4742</b>                | <b>0.9</b> | <b>0.8</b> | <b>0.7</b> | <b>0.9</b> | <b>0.8</b> | <b>0.9</b>     | <b>1</b>   | <b>1</b>       | <b>1</b>       |
| <b><i>trm112Δ</i> (FF19)</b> | <b>1.1</b> | <b>2.4</b> | <b>0.4</b> | <b>0.6</b> | <b>0.6</b> | <b>1</b>       | <b>0.4</b> | <b>0.8</b>     | <b>0.7</b>     |
| <b><i>trm112Δ</i> (FF20)</b> | <b>1.1</b> | <b>2.6</b> | <b>0.6</b> | <b>0.7</b> | <b>0.7</b> | <b>1</b>       | <b>0.4</b> | <b>0.6</b>     | <b>0.6</b>     |
| <b><i>TRM112-TAP</i></b>     | <b>1.1</b> | <b>1</b>   | <b>0.8</b> | <b>0.8</b> | <b>0.8</b> | <b>1</b>       | <b>2.0</b> | <b>1</b>       | <b>1.1</b>     |
