# Supplementary material
Source: PubMed Central journal article supplement (PMC3372273)
Supplement: supp_32.12.2254_MCB-MCB06623-11-s03.pdf [file supp_32.12.2254_MCB-MCB06623-11-s03.pdf]

SUPPLEMENTAL TABLE S3

| Accession Number   | Molecular Weight | TAP alone | Trm112-TAP | Functions                                          |
|--------------------|------------------|-----------|------------|----------------------------------------------------|
| sp P05319 RPP2A    | 11               | 0         | 5          | RPL                                                |
| sp P0CX85 RPL35B   | 14               | 2         | 9          | RPL                                                |
| sp P0CX41 RPL23A   | 14               | 2         | 7          | RPL                                                |
| ▶ sp P53738 TRM112 | 15               | 0         | 6          | MTase cofactor                                     |
| sp P04456 RPL25    | 16               | 2         | 7          | RPL                                                |
| sp P28000 RPA19    | 16               | 0         | 3          | rRNA synthesis, core Pol I subunit                 |
| sp P53141 MLC1     | 16               | 0         | 3          | others                                             |
| sp P02407 RS17A    | 16               | 0         | 8          | RPS                                                |
| sp Q02642 EGD1     | 17               | 0         | 3          | translation Factors                                |
| sp P37263 UPF0743  | 18               | 0         | 3          | others                                             |
| sp P26781 RS11     | 18               | 0         | 6          | RPS                                                |
| sp A6ZT99 EGD2     | 19               | 0         | 3          | translation Factors                                |
| sp P48164 RS7B     | 22               | 0         | 7          | RPS                                                |
| sp P53030 RL1      | 24               | 0         | 8          | RPL                                                |
| ▶ sp Q03920 MTQ2   | 25               | 0         | 20         | MTase                                              |
| sp P26783 RPS5     | 25               | 4         | 12         | RPS                                                |
| ▶ sp P25627 BUD23  | 31               | 0         | 12         | MTase                                              |
| sp P40961 PHB1     | 31               | 0         | 3          | others                                             |
| ▶ sp P49957 TRM9   | 32               | 0         | 23         | MTase                                              |
| sp P10080 SBP1     | 33               | 0         | 4          | translation, P Body component, snoRNA associated   |
| sp P15646 NOP1     | 34               | 0         | 8          | Mtase, pre 40S                                     |
| sp P18239 PET9     | 34               | 0         | 4          | others                                             |
| sp P20459 SUI2     | 35               | 0         | 10         | translation Factors, eIF2                          |
| sp P40217 TIF34    | 39               | 0         | 12         | translation Factors, eIF3                          |
| sp P08524 ERG20    | 40               | 0         | 3          | others                                             |
| sp P49723 RNR4     | 40               | 0         | 6          | others                                             |
| sp P10659 SAM1     | 42               | 5         | 14         | others                                             |
| sp P14126 RPL3     | 44               | 0         | 13         | RPL                                                |
| sp P38911 FPR3     | 47               | 0         | 3          | others                                             |
| sp P33298 RPT3     | 48               | 0         | 3          | others                                             |
| ▶ sp P12385 SUP45  | 49               | 0         | 5          | translation Factors, eRF1, substrat of Mtq2-Trm112 |
| ▶ sp Q12463 TRM11  | 50               | 0         | 39         | MTase                                              |
| sp P09733 TUB1     | 50               | 0         | 4          | others                                             |
| sp Q12464 RVB2     | 52               | 0         | 6          | pre 40S                                            |
| sp P07284 SES1     | 53               | 0         | 7          | others                                             |
| sp P33322 CBF5     | 55               | 3         | 11         | pre 40S                                            |
| sp P38934 BFR1     | 55               | 0         | 5          | others                                             |
| sp Q03532 HAS1     | 57               | 0         | 4          | pre 60S                                            |
| sp P15625 FRS2     | 58               | 0         | 4          | others                                             |
| sp P20447 DBP3     | 59               | 0         | 9          | pre 60S, helicase                                  |
| sp P24783 DBP2     | 61               | 0         | 12         | pre 60S, helicase                                  |
| sp Q06631 BFR2     | 61               | 0         | 4          | others                                             |
| sp P15565 TRM1     | 64               | 0         | 4          | MTase                                              |
| sp P04802 DPS1     | 64               | 3         | 16         | others                                             |
| sp P49090 ASN2     | 65               | 0         | 4          | others                                             |
| sp P40024 ARB1     | 68               | 6         | 13         | pre 60S, pre 40S                                   |
| sp P40991 NOP2     | 70               | 0         | 7          | pre 60S                                            |
| sp P53261 NOP7     | 70               | 0         | 6          | pre 60S                                            |
| sp Q02892 NOG1     | 74               | 0         | 4          | pre 60S, GTPase                                    |
| sp Q07896 NOC3     | 76               | 0         | 4          | pre 60S                                            |
| sp P47075 VTC4     | 83               | 0         | 11         | others                                             |
| sp P53131 PRP43    | 88               | 0         | 4          | others                                             |
| sp P06103 PRT1     | 88               | 2         | 14         | translation Factors, eIF3                          |
| sp Q07381 TSR1     | 91               | 0         | 5          | pre 40S                                            |
| sp A6ZMA9 ERB1     | 92               | 0         | 5          | pre 60S                                            |
| sp P43585 VTC2     | 95               | 0         | 7          | others                                             |
| sp Q04500 UTP14    | 103              | 0         | 4          | pre 40S                                            |
| sp P39730 FUN12    | 112              | 0         | 17         | translation Factors                                |
| sp P27692 SPT5     | 116              | 0         | 3          | rRNA synthesis, elongation factor                  |
| sp P53914 KRE33    | 119              | 0         | 6          | pre 40S                                            |
| sp P40069 KAP123   | 123              | 0         | 13         | pre 60S                                            |
| sp P09436 ILS1     | 123              | 0         | 8          | others                                             |
| sp P22138 RPA135   | 136              | 0         | 11         | rRNA synthesis, core Pol I subunit                 |
| sp P53622 COP1     | 136              | 0         | 4          | others                                             |
| sp Q12754 RRP12    | 138              | 0         | 8          | pre 60S, pre 40S                                   |
| sp Q04217 DHR1     | 145              | 0         | 4          | pre 40S, helicase                                  |
| sp Q06706 IKI3     | 153              | 0         | 5          | others                                             |
| sp Q03640 TCB3     | 171              | 0         | 6          | others                                             |
| sp P08566 ARO1     | 175              | 0         | 6          | others                                             |
| sp P10964 RPA190   | 186              | 0         | 12         | rRNA synthesis, core Pol I subunit                 |
| sp Q05022 RRP5     | 193              | 0         | 12         | pre 60S, pre 40S                                   |
| sp Q00955 ACC1     | 250              | 0         | 16         | others                                             |
| sp Q12019 MDN1     | 559              | 0         | 7          | pre 60S, recycling of trans-acting factors         |
