# Supplementary material
Source: PubMed Central journal article supplement (PMC3372273)
Supplement: supp_32.12.2254_MCB-MCB06623-11-s05.pdf [file supp_32.12.2254_MCB-MCB06623-11-s05.pdf]

## SUPPLEMENTAL TABLE AND FIGURE LEGENDS

### **Table S1: *trm112*Δ cells are defective for pre-ribosome export and progression through mitosis**

Quantification of cells observed under fluorescence microscopy presenting ribosomal subunit export and/or mitosis defects

### **Table S2: Phosphorimager quantification of Northern blots**

Amount of different pre-rRNA/RNA species relative to BY4741 wild type cells

### **Table S3: Trm112 interactomics**

Identifications of proteins interacting with Trm112-TAP. The third (yeast strain expressing the TAP-tag alone) and fourth (strain expressing Trm112-TAP) columns indicate the number of peptides identified through LC/MS-MS analysis in two experiments.

### **Figure S1: Untagged Trm112 does not bind nickel affinity matrix**

Coomassie blue staining of an SDS-PAGE gel

Lane 1, total bacterial extract from cells expressing untagged Trm112 from pET11a-TRM112 plasmid after IPTG induction (1 mM); lane 2, flow through; Lane 3, molecular weight marker; lane 4 to 8, elution in increasing concentration of imidazole-containing buffer (up to 150 mM). The arrow indicates beta-lactamase expression from pET plasmid
