# Supplementary material
Source: PubMed Central journal article supplement (PMC3372273)
Supplement: supp_32.12.2254_MCB-MCB06623-11-s06.pdf [file supp_32.12.2254_MCB-MCB06623-11-s06.pdf]

## SUPPLEMENTAL MATERIALS AND METHODS

### Yeast strains

Yeast strains were either purchased from Euroscarf, Open Biosystems, or purposely made following the transformation, and integration on the chromosome by homologous recombination, of suitable PCR cassettes generated with the DNA templates and the oligonucleotides listed below. FF19 and FF20 were obtained through sporulation of strain Y25421, and isolation of haploids following G418 selection.

Strains purchased:

| Strain Ref ID             | Strain name                   | Strain genotype                                                                                             | Strain origin     |
|---------------------------|-------------------------------|-------------------------------------------------------------------------------------------------------------|-------------------|
| YDL1542                   | BY4741 (Y00000)               | <i>MAT a his3Δ1 leu2Δ0 met15Δ0 ura3Δ0</i>                                                                   | Euroscarf         |
| YDL1543                   | BY4742 (Y10000)               | <i>MAT α his3Δ1 leu2Δ0 lys2Δ0 ura3Δ0</i>                                                                    | Euroscarf         |
| YSC1178-7502608 (YDL2366) | TRM112-TAP                    | <i>Mat a (his3Δ1) leu2Δ0 met15Δ0 ura3Δ0 TRM112::TAP-HIS3MX6</i>                                             | Open Biosystems   |
| Y25421 (YDL2369)          | <i>trm112::kanMX4/ TRM112</i> | <i>Mat a/α; his3Δ1/his3Δ1 leu2Δ0/leu2Δ0 lys2Δ0/LYS2 MET15/met15Δ0 ura3Δ0/ura3Δ0 ynr046w::kanMX4/YNR046w</i> | Euroscarf         |
| YDL2616                   | <i>bud23::kanMX4</i>          | <i>Mat a his3Δ1 leu2Δ0 met15Δ0 ura3Δ0 bud23Δ::kanMX4</i>                                                    | Charlie Boone Lab |

Strains generated in this work:

| Strain Ref ID                     | Strain name          | Strain genotype                                             | Strain construction   | Host strain |
|-----------------------------------|----------------------|-------------------------------------------------------------|-----------------------|-------------|
| FF19 (YDL2367) and FF20 (YDL2368) | <i>trm112Δ</i>       | <i>ura3Δ0 his3Δ1 leu2Δ0 trm112::kanMX4</i>                  | Y25421 sporulation    | n/a         |
| YDL2492                           | <i>trf5Δ</i>         | <i>MAT a his3Δ1 leu2Δ0 met15Δ0 ura3Δ0 trf5Δ::CgHIS3 MX6</i> | pDL0092 LD808 x LD809 | YDL1542     |
| YDL2494                           | <i>trm112Δ trf5Δ</i> | <i>ura3Δ0 his3Δ1 leu2Δ0 trm112::kanMX4 trf5Δ::CgHIS3MX6</i> | pDL0092 LD808 x LD809 | FF19        |
| YDL2488                           | <i>trf4Δ</i>         | <i>MaT a his3Δ1 leu2Δ0 met15Δ0 ura3Δ0 trf4Δ::CgHIS3MX6</i>  | pDL0092 LD982 x LD983 | YDL1542     |

|                    |                      |                                                                                 |                                                |                   |
|--------------------|----------------------|---------------------------------------------------------------------------------|------------------------------------------------|-------------------|
| YDL2490            | <i>trm112Δ trf4Δ</i> | <i>ura3Δ0 his3Δ1 leu2Δ0</i><br><i>trm112::kanMX4</i><br><i>trf4Δ::CgHIS3MX6</i> | pDL0092<br>LD982 x LD983                       | FF19              |
| yVH90<br>(YDL2649) | <i>trm112Δ</i>       | <i>MAT a his3Δ1 leu2Δ0</i><br><i>met15Δ0 ura3Δ0</i><br><i>trm112Δ::LEU2</i>     | pRS315<br>TRM112delup x<br>TRM112dellow        | YDL1542           |
| YDL2618            | TAP-alone            | <i>MAT a his3Δ1 leu2Δ0</i><br><i>met15Δ0 +</i><br><i>pBAT1::TAP-URA3-Kl</i>     |                                                | Lafontaine<br>Lab |
| yHE4               | bud23Δ               | <i>MAT a his3Δ1 leu2Δ0</i><br><i>met15Δ0 ura3Δ0</i><br><i>bud23Δ::ura3</i>      | pRS316<br>BUD23auxdelup<br>x<br>BUD23auxdellow | YDL1542           |

### Plasmids used in this study

| Plasmid name                      | Marker, origin of replication     | Insert                                              | Reference     |
|-----------------------------------|-----------------------------------|-----------------------------------------------------|---------------|
| pYeDP60                           | <i>URA3</i> , 2μm                 | n/a                                                 | Prof Pompon   |
| pYeDP60 (Mtg2H6) =<br>pYeVH407    | <i>URA3</i> , 2μm                 | Mtg2(His)6 expressed<br>from GAL10-CYC1<br>promoter | 1             |
| pRS316-RPL25eGFP                  | <i>URA3</i> , <i>CEN/ARS</i>      | Rpl25-eGFP                                          | Prof Hurt     |
| pRS316-RPS2-eGFP                  | <i>URA3</i> , <i>CEN/ARS</i>      | Rps2-eGFP                                           | Prof Hurt     |
| pRS423                            | <i>HIS3</i> , 2μm                 |                                                     |               |
| pRS423 ( <i>pGAL::TRM112</i> )    | <i>HIS3</i> , 2μm                 | Trm112 expressed from<br>Gal1 promoter              | This study    |
| pACDuet (His <sub>6</sub> -BUD23) | Cm, p15A <i>E. coli</i><br>origin | (His)6 Bud23 expressed<br>from T7 promoter          | This study    |
| pET11a (TRM112) = pVH451          | Ap, Kn, ColE1<br>origin           | Trm112 expressed from T7<br>promoter                | 2             |
| pDL0092 (pBS1762)                 | HIS3 Cg                           | n/a                                                 | Prof Séraphin |

pACDuet(His<sub>6</sub>Bud23), a derivative of pACYC-Duet1 (Novagen) expressing Bud23 with a His<sub>6</sub> tag on its N terminus was constructed by inserting BUD23's ORF between the NdeI and Bgl II sites. BUD23's ORF was PCR-amplified from yeast (strain BY4741) chromosomal DNA with the following oligonucleotides introducing NdeI and BglIII sites (up 5'-

CAGAGAAGAACATATGCACCACCACCACCACCT

CACGTCCTGAGGAGTTGGCAC-3'; down 5'-CGTGTGAAGATCTGTGTTTC

TTCTAGAAC-3').

### Oligonucleotides used for the construction of yeast strains

|                    |                                                                             |
|--------------------|-----------------------------------------------------------------------------|
| BUD23<br>auxdelup  | AGTAGTGCTAAAAAGGTGCGGTACGGAAACACAGG<br>AAATATATCAGAGAAGCGTTTCGGTGATGAC      |
| BUD23<br>auxdellow | GTGTGTATTTTTATAGTATACAAAAGAATATGCGTGT<br>GAGGATGTGTGTTCTGATGCGGTATTTCTCCT   |
| LD808              | ATTTTTATTTTTCAAATAAACAAACGAGGGCGGAGT<br>TTATTGGGTCGTCCACAGGAAACAGCTATGACC   |
| LD809              | TGTGGTATTCTTGTATAAATAGTAAATAGTCTATAAG<br>AGTCTATATTGTGGTTGTAAAACGACGGCCAGT  |
| LD982              | AACGTTACGCTTTCATAAAGTGTGAATAAGCAAGGG<br>AACTATACTTGAAATCACAGGAAACAGCTATGACC |
| LD983              | GGTACACAGTGATGTACAGTTCAGTGCATCATTTAA<br>ACAAAAGGCACATAGTTGTAAAACGACGGCCAGT  |
| TRM112de<br>lup    | CATCCTATGATCTCTTCGGCTCTACACATCATATTAC<br>TAGCCTAGTCAACCGTTTCGGTGATGAC       |
| TRM112de<br>llow   | TAGCTGTGTATATAGTTGTCTTTTCGTCTTGCGTGCCC<br>ACACACAGAGTTCCTGATGCGGTATTTCTCCT  |

#### Oligonucleotides used for Northern-blot and primer extension analysis

|        |                      |
|--------|----------------------|
| LD336  | CGGTTTTAATTGTCCTA    |
| LD359  | TTGTTACCTCTGGGCCC    |
| LD339  | GGCCAGCAATTTCAAGTTA  |
| LD871  | CATGGCTTAATCTTTGAGAC |
| LD1148 | CTCCGCTTATTGATATGC   |
| LD915  | GCGTTCTTGATCGATGC    |
| LD1290 | ATCCCGGCCGCCTCCATCAC |
| LD2092 | CTCTGAGATGGAGTTGCCCC |
| LD2484 | CGCTGCTCACCAATGG     |

#### Oligonucleotides used for RTqPCR analysis

|                    |                      |
|--------------------|----------------------|
| LD714 (actin-Fwd)  | CGTTCCAATTTACGCTGGTT |
| LD715 (actin-Rev)  | AGCGGTTTGCATTTCTTGTT |
| LD2480 (BUD23-Fwd) | CAGCATATCCAGGCGAAGAT |
| LD2481 (BUD23-Rev) | CGCCCTCCAGCTCTCTACTA |

#### SUPPLEMENTAL REFERENCES

1. **Heurgué-Hamard, V., S. Champ, L. Mora, T. Merkulova-Rainon, L. L. Kisselev, and R. H. Buckingham.** 2005. The glutamine residue of the conserved GGQ motif in *Saccharomyces cerevisiae* release factor eRF1 is methylated by the product of the YDR140w gene. *J Biol Chem* **280**:2439-45.
2. **Heurgué-Hamard, V., M. Graille, N. Scrima, N. Ulryck, S. Champ, H. van Tilbeurgh, and R. H. Buckingham.** 2006. The zinc finger protein Ynr046w is plurifunctional and a component of the eRF1 methyltransferase in yeast. *J Biol Chem* **281**:36140-8.
