# Supplementary material
Source: PubMed Central journal article supplement (PMC3372273)

## SUPPLEMENTAL FIGURE S1

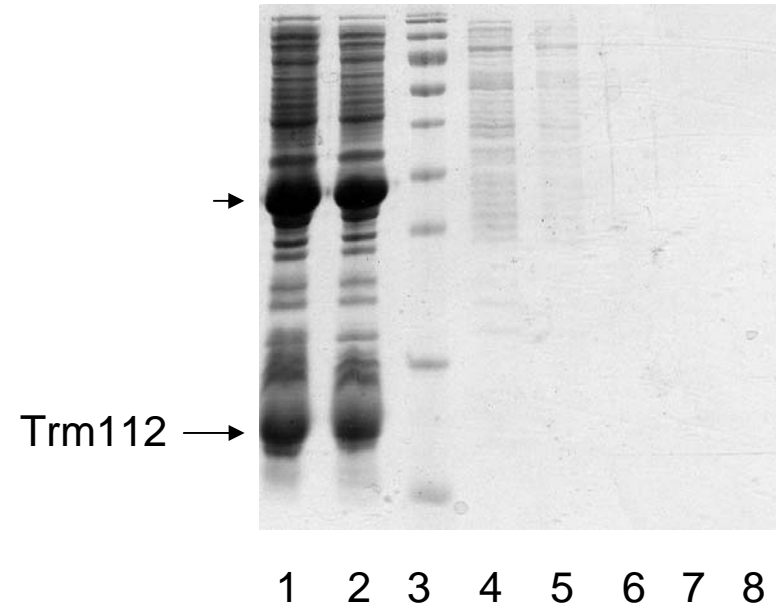

Supplement: supp_32.12.2254_MCB-MCB06623-11-s04.pdf [file supp_32.12.2254_MCB-MCB06623-11-s04.pdf]
